# Supplementary material
Source: Springer Nature journal article supplement (https://www.springermedizin.de/resource/supplementary/12971_2013_157_MOESM1_ESM.pdf/9595056)

# Current smokers vs. non-smokers

## Phase 1 analysis

Distribution of treated disease or encounter

## Phase 2 analysis

Stage of disease progression

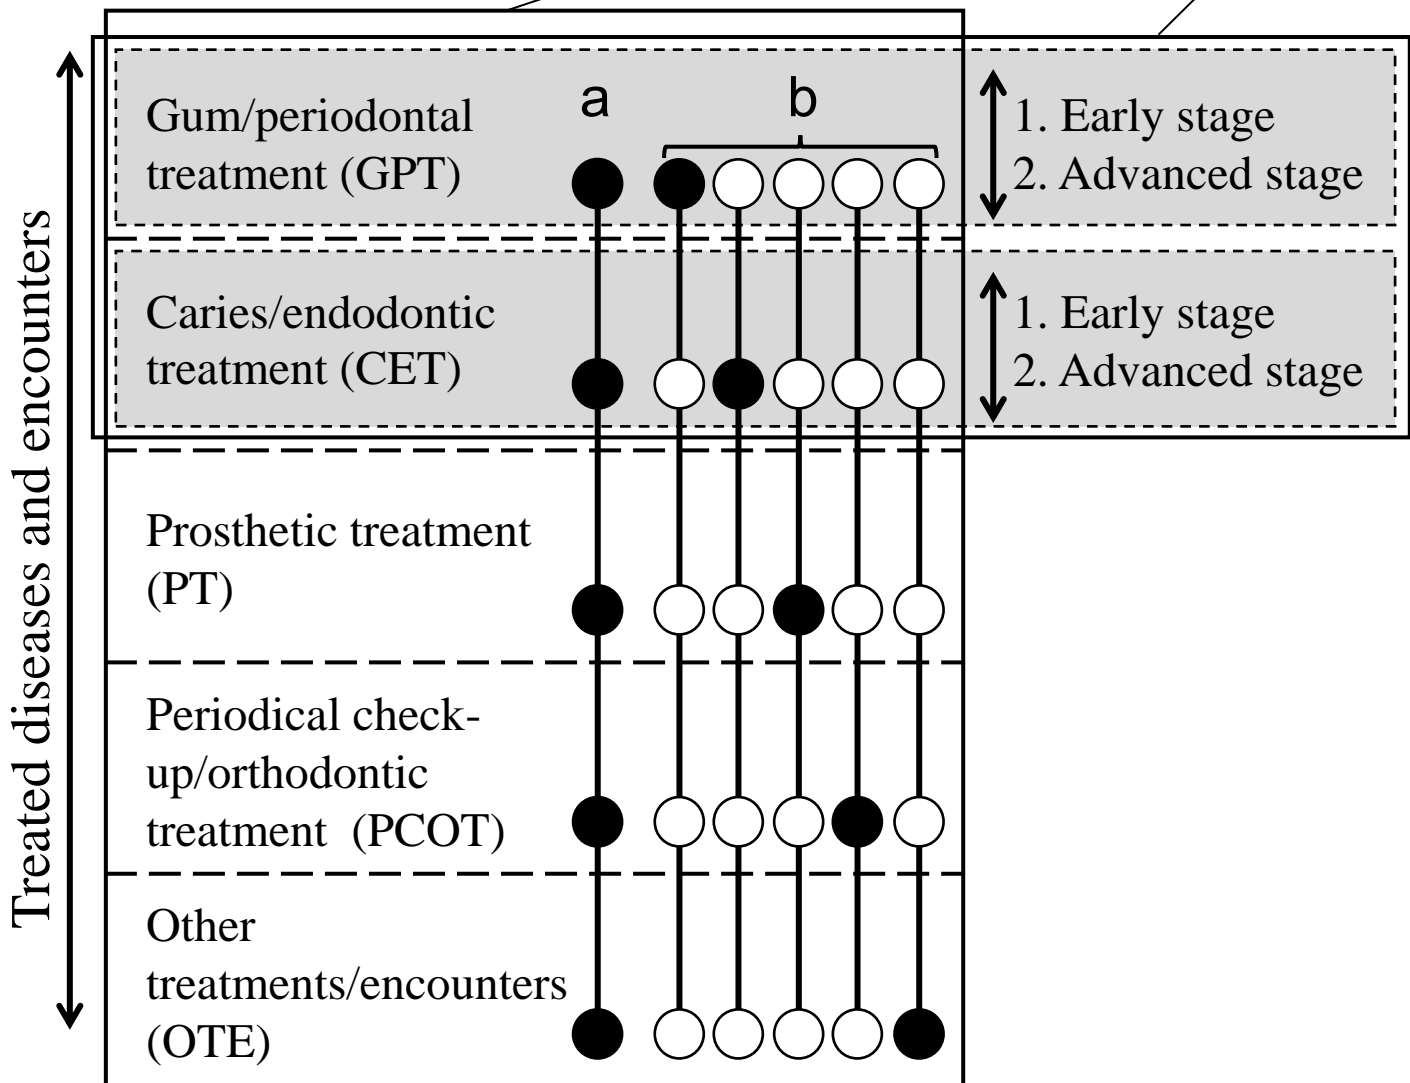

Supplement: MOESM1 [file 9595056]
